# Supplementary material for: Would the Kalimantan Islands of Indonesia be secure against droughts and forest fires in a changing climate?
Source: Research Square preprint supplement (doi:10.21203/rs.3.rs-2797250/v1), 2023-05-04
Supplement: Supplementary file 1 [file 28d42deab59f7bd03a4fe328.docx]

**Supplementary**

| 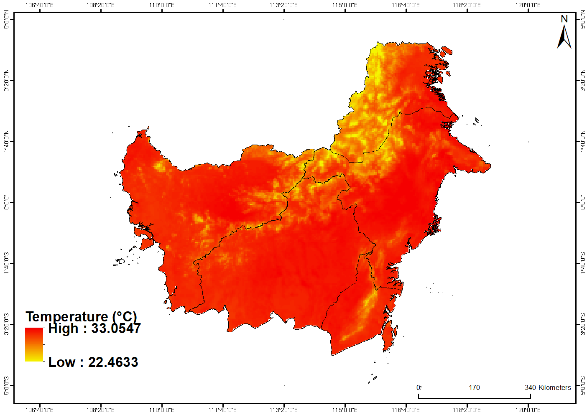 | 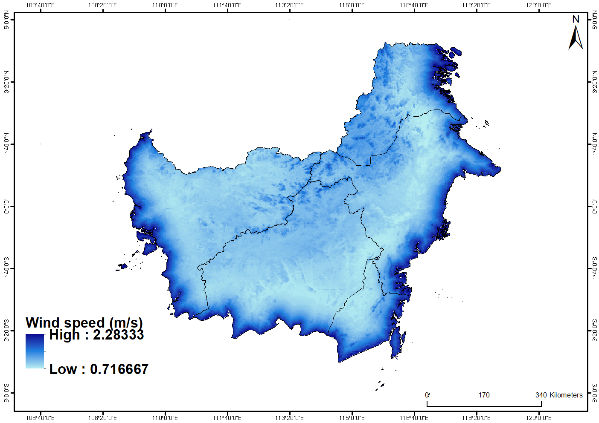 |
| --- | --- |
| Temperature | Wind speed |
| 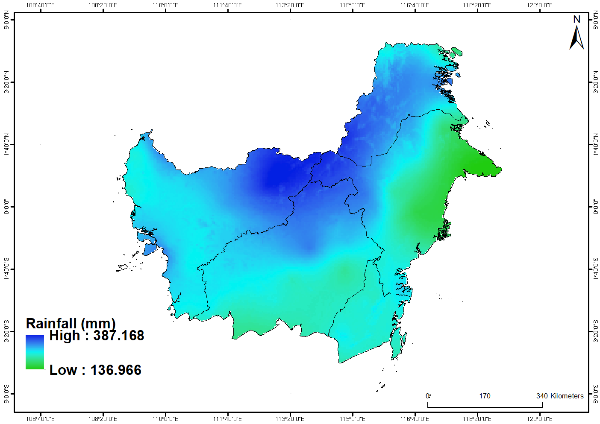 | 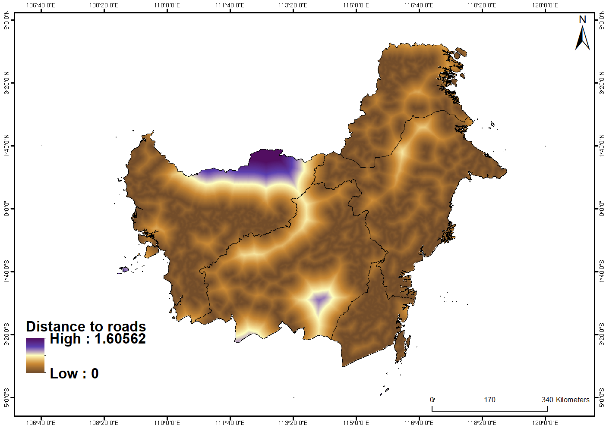 |
| Rainfall | Distance t. o roads |
| 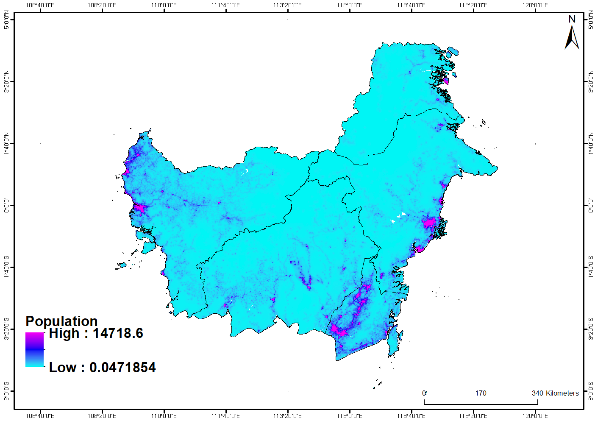 | 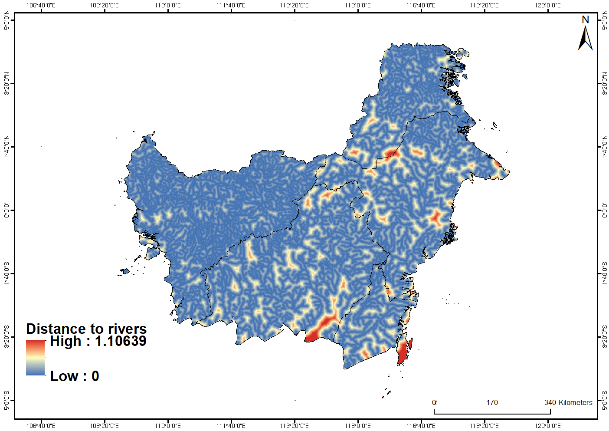 |
| Population | Distance to rivers |
| 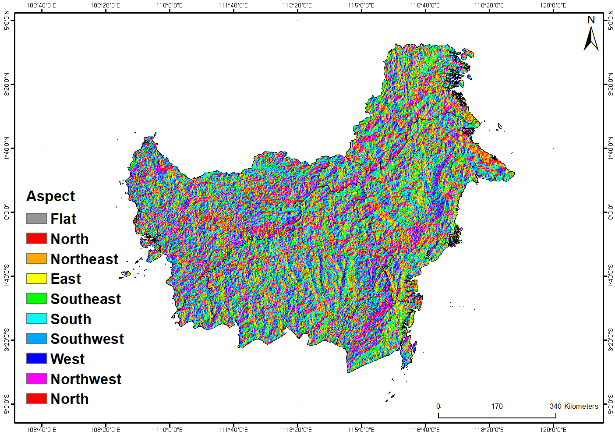 | 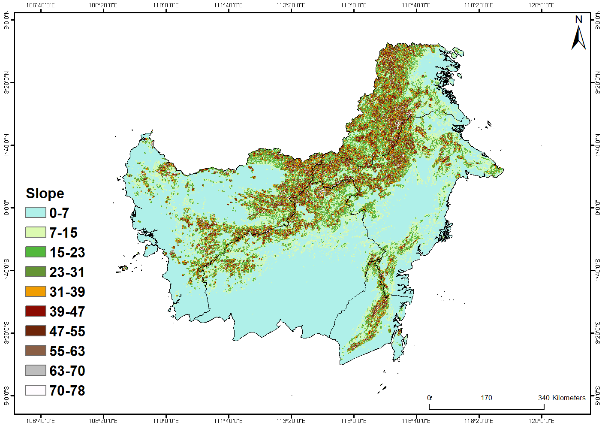 |
| Aspect | Slope |
| 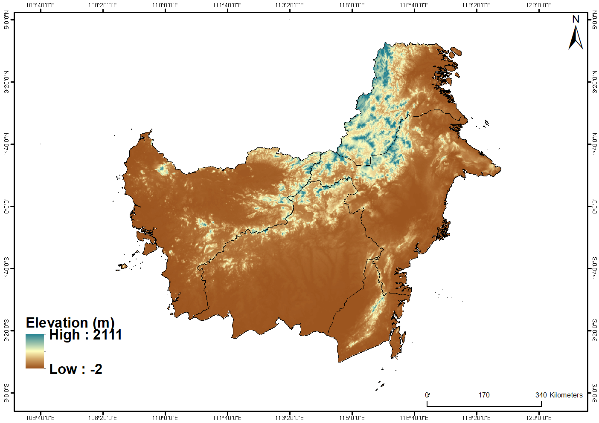 | 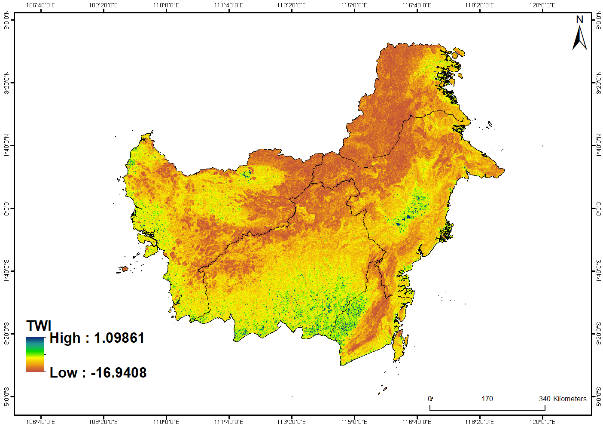 |
| Elevation | TWI |
| 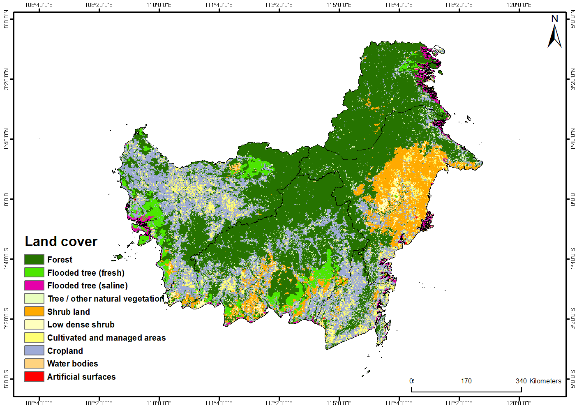 | |
| Land cover | |

##### **Fig. a1.** MH conditioning factors in Kalimantan
